# Supplementary material for: Fungal Glycoside Hydrolases Display Unique Specificities for Polysaccharides and Staphylococcus aureus Biofilms
Source: MDPI journal article supplement (doi:10.3390/microorganisms11020293), 2023-01-23
Supplement: s1 [file s1]

## Supplemental Data

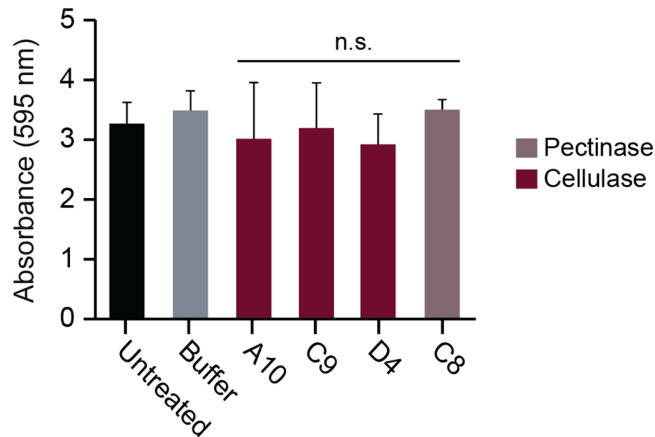

**Figure S1.** GHs identified by polysaccharide agar screens do not disrupt biofilms. *S. aureus* biofilms were grown on polystyrene treated with spent growth media from four strains of GH-expressing *P. pastoris*. All wells were stained with 0.1% crystal violet, and the absorbance was measured at OD<sub>595</sub> (n=2).

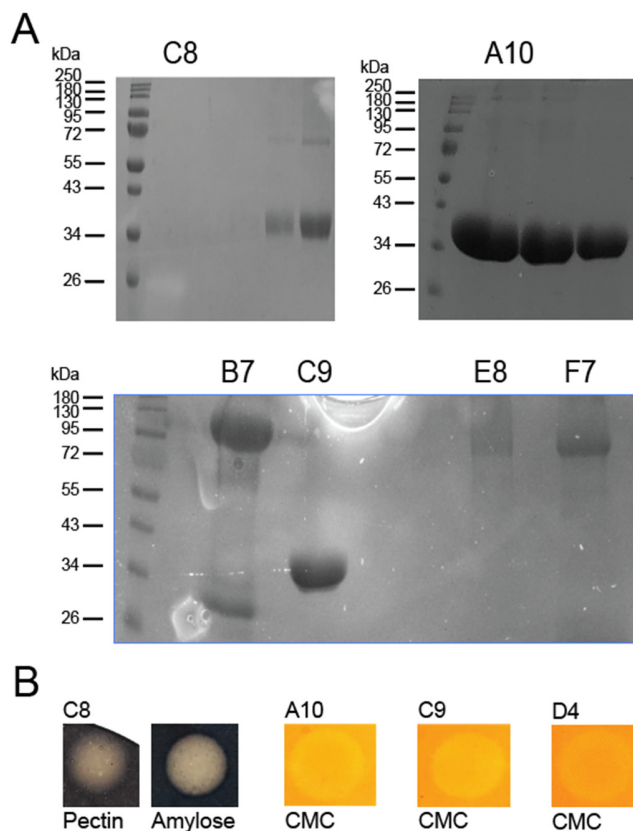

**Figure S2.** The purification and activity of recombinant GHs expressed by *P. pastoris*. (A) SDS-PAGE gels loaded with fractions containing purified GHs E8 ( $\alpha$ -xylosidase, Acc number), C8 (pectinase, AN3390.2), A10 (cellulase, AN1285.2), C9 (cellulase, AN3418.2), D4 (cellulase, AN5214.2), F7 ( $\beta$ -xylosidase, AN8401.2), and B7 ( $\beta$ -xylosidase, AN8401.2). (B) After incubation with GH, agar was stained with either Congo Red or Lugol's solution to detect hydrolysis. Concentrations are direct elution fractions all  $>1 \text{ mg mL}^{-1}$ .

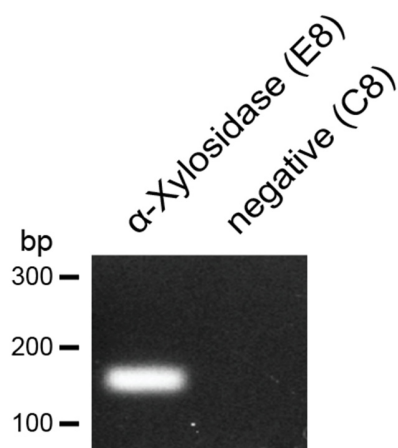

**Figure S3.** Confirmation of E8  $\alpha$ -xylosidase gene by PCR. Agarose gel electrophoresis of PCR products targeting the  $\alpha$ -xylosidase gene (accession no. AN7505.2). Genomic DNA from *P. pastoris* from well E8 (Lane 1) and C8 as a negative control (Lane 2). The expected product from amplifying the  $\alpha$ -xylosidase gene is 173 bp.

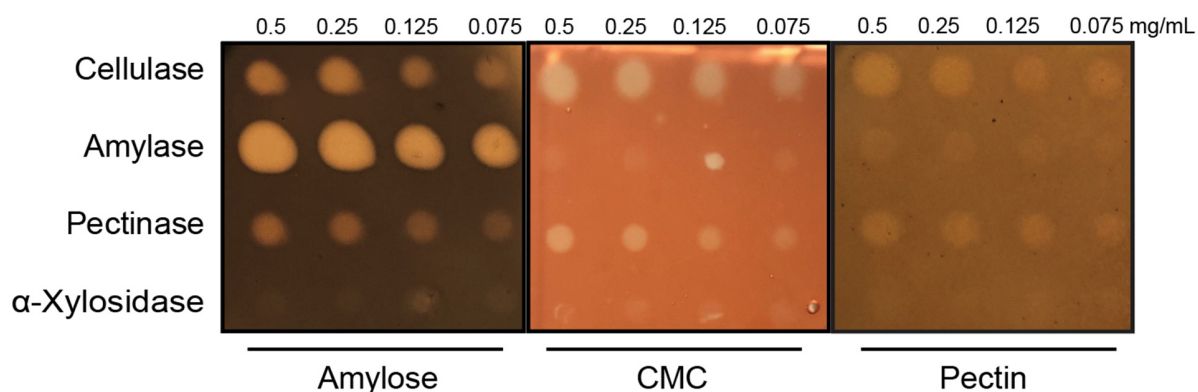

**Figure S4.** Purified  $\alpha$ -xylosidase is not active in the hydrolysis of amylose, CMC, or pectin. Commercial preparations of different GHs and purified recombinant E8  $\alpha$ -xylosidase (A), and *A. thermomutatus*  $\alpha$ -xylosidase (B), were pinned at different concentrations on 1% w/v amylose, CMC, and pectin containing agar. Plates were stained with Congo Red and Lugol's solution to detect hydrolysis.

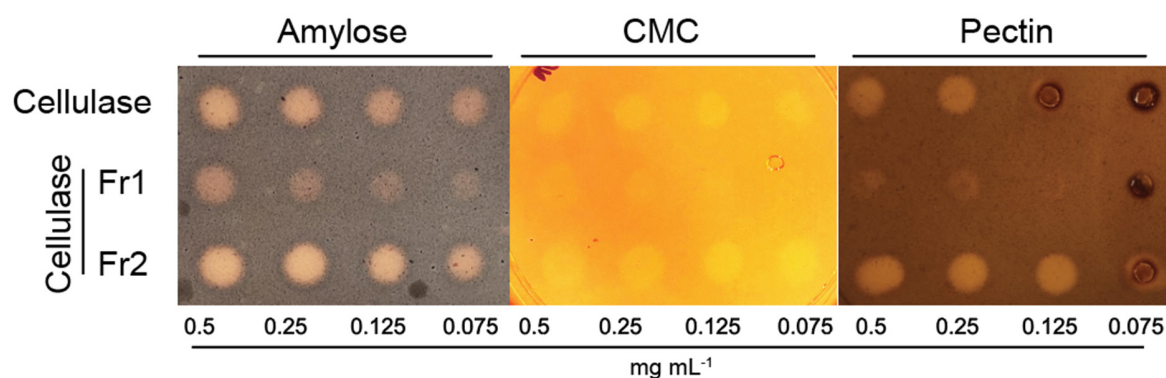

**Figure S5.** Commercial preparations of cellulase and amylase contain contaminating proteins with different GH activities. Commercial cellulase, and fraction 1 (glucoamylase; UniProt accession number A0A117E3H6), and

fraction 2 ( $\beta$ -xylanase; UniProt accession number A0A100I6F6) were spotted at different concentrations on amylose, CMC, and pectin-containing agar before staining with either Congo Red and or Lugol's solution.

**Table S1.** Recombinant GHs created by Bauer et al. used in this study.

| FGSC # | Genbank Accession # | Well |
|--------|---------------------|------|
| 9925   | AN1542.2            | A1   |
| 10060  | AN0393.2            | A2   |
| 10061  | AN0452.2            | A3   |
| 10062  | AN0494.2            | A4   |
| 10063  | AN712.2             | AS   |
| 10064  | AN741.2             | A6   |
| 10065  | AN787.2             | A7   |
| 10066  | AN941.2             | AS   |
| 10067  | AN1277.2            | A9   |
| 10068  | AN1285.2            | AI0  |
| 10069  | AN155J.2            | A11  |
| 10070  | AN1571.2            | A12  |
| 10071  | AN1602.2            | B1   |
| 10072  | AN1804.2            | B2   |
| 10073  | AN1818.2            | B3   |
| 10074  | AN2206.2            | B4   |
| 10075  | AN2227.2            | B5   |
| 10076  | AN2331.2            | B6   |
| 10077  | AN2359.2            | B7   |
| 10078  | AN2385.2            | B8   |
| 10079  | AN2528.2            | B9   |
| 10080  | AN2559.2            | B10  |
| 10081  | AN2612.2            | B11  |
| 10082  | AN3044.2            | B12  |
| 10083  | AN3049.2            | C1   |
| 10084  | AN3201.2            | C2   |
| 10085  | AN3294.2            | C3   |
| 10086  | AN3297.2            | C4   |
| 10087  | AN3337.2            | C5   |
| 10088  | AN3358.2            | C6   |
| 10089  | AN3368.2            | C7   |
| 10090  | AN3390.2            | C8   |
| 10091  | AN3418.2            | C9   |
| 10092  | AN3613.2            | C10  |

|       |          |     |
|-------|----------|-----|
| 10093 | AN3777.2 | C11 |
| 10094 | AN4372.2 | C12 |
| 10095 | AN4700.2 | D1  |
| 10096 | AN4843.2 | D2  |
| 10097 | AN5176.2 | D3  |
| 10098 | AN5214.2 | D4  |
| 10099 | AN5267.2 | D5  |
| 10100 | AN5282.2 | D6  |
| 10101 | AN5361.2 | D7  |
| 10102 | AN5727.2 | D8  |
| 10103 | AN6093.2 | D9  |
| 10104 | AN6352.2 | D10 |
| 10105 | AN6395.2 | D11 |
| 10106 | AN6427.2 | D12 |
| 10107 | AN6470.2 | E1  |
| 10108 | AN7135.2 | E2  |
| 10109 | AN7152.2 | E3  |
| 10110 | AN7180.2 | E4  |
| 10111 | AN7345.2 | E5  |
| 10112 | AN7349.2 | E6  |
| 10113 | AN7413.2 | E7  |
| 10114 | AN7505.2 | E8  |
| 10115 | AN7533.2 | E9  |
| 10116 | AN7541.2 | E10 |
| 10117 | AN7624.2 | E11 |
| 10118 | AN7646.2 | E12 |
| 10119 | AN7908.2 | F1  |
| 10120 | AN7950.2 | F2  |
| 10121 | AN8007.2 | F3  |
| 10122 | AN8138.2 | F4  |
| 10123 | AN8149.2 | F5  |
| 10124 | AN8327.2 | F6  |
| 10125 | AN8401.2 | F7  |
| 10126 | AN8453.2 | F8  |
| 10127 | AN8761.2 | F9  |
| 10128 | AN9035.2 | F10 |
| 10129 | AN9045.2 | F11 |
| 10130 | AN9134.2 | F12 |
| 10131 | AN9286.2 | G1  |

|       |            |    |
|-------|------------|----|
| 10132 | Afu8g06890 | G2 |
| 10133 | NCU09102.7 | G3 |
| 10134 | AN3556.2   | G4 |

**Table S2.** Primers used in this study. Underlines sequence represents regions of sequence homology used during the construction of plasmids by recombineering.

| Primer   | Sequence                                                                                     | Notes                                                                                                                                                   |
|----------|----------------------------------------------------------------------------------------------|---------------------------------------------------------------------------------------------------------------------------------------------------------|
| JEx0015  | <u>GCTGAATTCACGTGGCCAGCCGGCCGTCT</u><br><u>ATGAAGTTTACCGAGGGAATGTGG</u>                      | Forward primer used to amplify the fragment containing the <i>A. thermomutatus</i> $\alpha$ -xylosidase gene.                                           |
| JEx002   | <u>GGCGGCCCGCCGGCTCGAGGTACCGATCC</u><br><u>TCAATGATGATGATGATGATGGTCGACG</u>                  | Reverse primer used to amplify the fragment containing the <i>A. thermomutatus</i> $\alpha$ -xylosidase gene.                                           |
| JEx003   | GGATCGGTACCTCGAGCCG                                                                          | Forward primer used to amplify a region of the pPICZ $\alpha$ A vector.                                                                                 |
| JEx004   | AAACTGTCAGTTTTGGGCCATTGGGGAAC                                                                | Reverse primer used to amplify a region of the pPICZ $\alpha$ A vector.                                                                                 |
| JEx005   | <u>GTTCCCAAATGGCCAAACTGACAGTTT</u><br><u>GATGCGGTATTTTCTCCTTACGC</u>                         | Forward primer used to amplify the fragment containing a URA3 gene and yeast 2-um origin.                                                               |
| JEx006   | CGAAAAGTGCCACCTGAACG                                                                         | Reverse primer used to amplify the fragment containing a URA3 gene and yeast 2-um origin.                                                               |
| JEx007   | <u>ACAGATGCTTCGTTCAAGTGGCACTTTTCG</u><br><u>AAACGCTGTCTTGGAACCTAATATGACAAAA</u><br><u>GC</u> | Forward primer used to amplify a region of the pPICZ $\alpha$ A vector.                                                                                 |
| JEx0016  | AGACGGCCGGCTGGGC                                                                             | Reverse primer used to amplify a region of the pPICZ $\alpha$ A vector.                                                                                 |
| JEx009   | CTAATATGACAAAAGCGTGATCTCATCC                                                                 | Forward primer used to amplify a region from the recombineering constructed plasmid, which is then used to transform <i>P. pastoris</i> .               |
| JEx010   | CTATTGACCCCACTCAGAAAGC                                                                       | Reverse primer used to amplify a region from the recombineering constructed plasmid which is then used to transform <i>P. pastoris</i> .                |
| JEx011   | ATTTAGAAGGGGATTTCGATGTTGC                                                                    | Forward primer used to amplify the <i>A. thermomutatus</i> $\alpha$ -xylosidase gene after it has been genomically integrated into <i>P. pastoris</i> . |
| JEx012   | CCCCTACCACAAGATATTCATCAGC                                                                    | Reverse primer used to amplify the <i>A. thermomutatus</i> $\alpha$ -xylosidase gene after it has been genomically integrated into <i>P. pastoris</i> . |
| JExREV01 | CGCGACTTATCTGTAGTTTGG                                                                        | Reverse sequencing primer for the <i>A. thermomutatus</i> $\alpha$ -xylosidase gene integrated into <i>P. pastoris</i> .                                |
| JExREV02 | TAAGACCATGAAGGCACAAG                                                                         | Reverse sequencing primer for the <i>A. thermomutatus</i> $\alpha$ -xylosidase gene integrated into <i>P. pastoris</i> .                                |
| JExREV03 | AAGTGTGCTACGAACCAAGC                                                                         | Reverse sequencing primer for the <i>A. thermomutatus</i> $\alpha$ -xylosidase gene integrated into <i>P. pastoris</i> .                                |
| JExREV04 | GTGGGAGCTCAGTAATCCAA                                                                         | Reverse sequencing primer for the <i>A. thermomutatus</i> $\alpha$ -xylosidase gene integrated into <i>P. pastoris</i> .                                |
| JExREV05 | ATCGGCAAAGTATCAAAGCC                                                                         | Reverse sequencing primer for the <i>A. thermomutatus</i> $\alpha$ -xylosidase gene integrated into <i>P. pastoris</i> .                                |

|          |                       |                                                                                                                          |
|----------|-----------------------|--------------------------------------------------------------------------------------------------------------------------|
| JExFOR02 | GTTGTCTATGGGAAAACACCA | Forward sequencing primer for the <i>A. thermomutatus</i> $\alpha$ -xylosidase gene integrated into <i>P. pastoris</i> . |
| JExFOR03 | ATGGTTCTGTGTGGCAGTG   | Forward sequencing primer for the <i>A. thermomutatus</i> $\alpha$ -xylosidase gene integrated into <i>P. pastoris</i> . |
| JExFOR04 | GTTACATATTTTGGGCCTCG  | Forward sequencing primer for the <i>A. thermomutatus</i> $\alpha$ -xylosidase gene integrated into <i>P. pastoris</i> . |
| JExFOR05 | GAAATGGACGTTGGAGGTC   | Forward sequencing primer for the <i>A. thermomutatus</i> $\alpha$ -xylosidase gene integrated into <i>P. pastoris</i> . |

**Table S3.** Purified  $\alpha$ -xylosidase retains activity. Purified enzyme was placed in buffer containing a final concentration of 0.1% w/v 4-Nitrophenyl  $\alpha$ -D-xylopyranoside. Presence of released o-nitrophenol by measurement of 405 nm absorbance was taken 50 seconds after reaction initiation. Reactions took place at room temperature.

| $\alpha$ -xylosidase (mg mL <sup>-1</sup> ) | 0.25  | 0.125 | 0.05  | 0.005 |
|---------------------------------------------|-------|-------|-------|-------|
| <i>A. nidulans</i> (E8) (405nm abs)         | 0.123 | 0.078 | 0.044 | 0     |
| <i>A. thermomutatus</i> (405nm abs)         | 0.022 | 0.002 | 0     | 0     |

**Table S4.** Potential proteins identified through mass spectrometry for cellulase fraction 1. Protein threshold set at 1.0% FDR, and individual peptide threshold set at 95% probability. (Accession refers to UniProt accession number, %Spec refers to protein percentage of total spectra, #Pep refers to the exclusive unique peptide count, #Unique refers to the exclusive unique spectrum count, #Spec refers to the exclusive spectrum count, %Cov refers to the percentage of amino acids identified. \*Most likely enzyme ID based on size, coverage and spectral data.

| Protein annotation                                | Accession  | %Spec | #Pep | #Unique | #Spec | %Cov   | m.w.     |
|---------------------------------------------------|------------|-------|------|---------|-------|--------|----------|
| Glucanase                                         | A0A117DZQ3 | 2.29% | 16   | 32      | 604   | 44.25% | 48296 Da |
| Glucoamylase*                                     | A0A117E3H6 | 0.23% | 13   | 20      | 60    | 27.06% | 68728 Da |
| Peptide hydrolase                                 | A0A117DVZ2 | 0.14% | 11   | 15      | 38    | 19.21% | 68831 Da |
| Endo- $\beta$ -1,4-mannanase F                    | A0A100ILF3 | 0.12% | 6    | 12      | 32    | 22.10% | 56129 Da |
| Exo- $\beta$ -1,3-glucanase                       | A0A117DW84 | 0.11% | 6    | 13      | 30    | 11.96% | 99332 Da |
| GPI-anchored cell wall organization protein Ecm33 | A0A117DX26 | 0.11% | 6    | 9       | 28    | 18.20% | 41158 Da |
| $\beta$ -xylanase                                 | A0A100I6F6 | 0.09% | 10   | 14      | 25    | 29.91% | 35060 Da |
| $\alpha$ -1,3-glucanase/mutanase                  | A0A100ICW4 | 0.09% | 10   | 14      | 24    | 17.06% | 54579 Da |
| $\alpha$ -galactosidase                           | A0A100I971 | 0.09% | 8    | 13      | 24    | 21.08% | 49094 Da |
| Probable endo- $\beta$ -1,4-glucanase             | A0A117DY27 | 0.08% | 6    | 11      | 22    | 10.54% | 36715 Da |
| Glucanase                                         | A0A100IHS6 | 0.07% | 6    | 10      | 19    | 25.50% | 42201 Da |
| Alpha-L-arabinofuranosidase                       | A0A117DZC8 | 0.06% | 6    | 8       | 15    | 18.84% | 52598 Da |
| Xylosidase: arabinofuranosidase                   | A0A100IHT3 | 0.05% | 8    | 8       | 14    | 13.81% | 60310 Da |

|                                      |            |       |   |   |    |        |           |
|--------------------------------------|------------|-------|---|---|----|--------|-----------|
| Fungal specific transcription factor | A0A100IN41 | 0.05% | 7 | 8 | 14 | 6.31%  | 128083 Da |
| 1,3- $\beta$ -glucanotransferase     | A0A100IR34 | 0.05% | 5 | 6 | 14 | 12.59% | 56966 Da  |
| 1,3- $\beta$ -glucanotransferase     | A0A100IHK3 | 0.05% | 6 | 8 | 14 | 20.16% | 52125 Da  |
| $\alpha$ -1,2-Mannosidase            | A0A117DW82 | 0.05% | 7 | 7 | 13 | 15.56% | 63073 Da  |
| 1,3- $\beta$ -glucanotransferase     | A0A100INU2 | 0.05% | 6 | 6 | 13 | 5.99%  | 114558 Da |
| $\alpha$ -amylase                    | A0A124BXE9 | 0.05% | 5 | 7 | 13 | 8.13%  | 127175 Da |

**Table S5.** Potential proteins identified through mass spectrometry for cellulase fraction 2. Protein threshold set at 1.0% FDR, and individual peptide threshold set at 95% probability. (Accession refers to UniProt accession number, %Spec refers to protein percentage of total spectra, #Pep refers to the exclusive unique peptide count, #Unique refers to the exclusive unique spectrum count, #Spec refers to the exclusive spectrum count, %Cov refers to the percentage of amino acids identified. \*Most likely enzyme ID based on size, coverage and spectral data.

| Protein annotation                                  | Accession  | %Spec | #Pep | #Unique | #Spec | %Cov   | m.w.      |
|-----------------------------------------------------|------------|-------|------|---------|-------|--------|-----------|
| Endo- $\beta$ -1,4-mannanase F                      | A0A100ILF3 | 1.02% | 11   | 25      | 266   | 30.34% | 56129 Da  |
| $\beta$ -xylosylase*                                | A0A100I6F6 | 0.24% | 15   | 23      | 63    | 53.58% | 35060 Da  |
| Probable glucan endo-1,3- $\beta$ -glucosidase eglC | A0A117E1K1 | 0.18% | 6    | 6       | 48    | 11.92% | 45945 Da  |
| Probable endo- $\beta$ -1,4-glucanase B             | A0A117DY27 | 0.14% | 9    | 16      | 37    | 24.70% | 36715 Da  |
| $\alpha$ -L-arabinofuranosidase                     | A0A100I6G0 | 0.14% | 6    | 13      | 36    | 26.81% | 36039 Da  |
| Glucanase                                           | A0A117DZQ3 | 0.13% | 7    | 10      | 35    | 22.35% | 48296 Da  |
| Endo- $\beta$ -1,4-glucanase D                      | A0A100IID9 | 0.10% | 7    | 9       | 27    | 12.75% | 41004 Da  |
| Endo- $\beta$ -1,4-glucanase D                      | A0A117E071 | 0.10% | 7    | 14      | 27    | 32.75% | 36762 Da  |
| WD repeat protein                                   | A0A124BWD4 | 0.07% | 6    | 8       | 19    | 4.66%  | 150204 Da |
| Feruloyl esterase A                                 | W6GEY2     | 0.07% | 5    | 9       | 18    | 21.35% | 30374 Da  |
| Pectinesterase                                      | A0A100IC32 | 0.07% | 6    | 8       | 17    | 26.91% | 34680 Da  |
| $\alpha$ -1,3-glucanase/mutanase                    | A0A100ICW4 | 0.05% | 6    | 8       | 14    | 15.67% | 54579 Da  |
| Endopolygalacturonases                              | A0A100I4L3 | 0.05% | 6    | 7       | 13    | 18.78% | 37955 Da  |
| Endoglucanase                                       | A0A100IKG6 | 0.04% | 5    | 6       | 11    | 18.41% | 25765 Da  |
